# Supplementary material
Source: PubMed Central journal article supplement (PMC3699369)
Supplement: NIHMS52956-supplement-01.pdf [file NIHMS52956-supplement-01.pdf]

IT IS SUGGESTED THAT THE TABLES BELOW APPEAR AS ONLINE SUPPLEMENTARY DATA, RATHER THAN IN PRINT

**Supplementary Table 4: Shift work and risk of miscarriage**

| Design                 | Study (reference)         | Number of women/<br>Pregnancies          | Exposure                                            |                  | RR (95% CI)       | Potential for     |             | Incomplete reporting | Meta-analysis <sup>b</sup> |
|------------------------|---------------------------|------------------------------------------|-----------------------------------------------------|------------------|-------------------|-------------------|-------------|----------------------|----------------------------|
|                        |                           |                                          | Contrast                                            | Timing           |                   | Bias <sup>a</sup> | Confounding |                      |                            |
| Prospective cohort     | Fenster, 1997 (17)        | 5144/5144                                | Evening/night vs day                                | 1 trim           | 1.03 (0.75-1.41)  | +/-               | No          | No                   | Yes (A) <sup>c</sup>       |
|                        | Zhu, 2004 (35)            | 33,694/33,694                            | 3 shift vs day                                      | 1 trim           | 1.10 (0.78-1.57)  | +/-               | No          | No                   | Yes (A) <sup>c</sup>       |
|                        |                           |                                          | Fixed night vs day                                  |                  | 1.81 (0.88-3.72)  | +/-               | No          | No                   | Yes (B) <sup>c</sup>       |
| Retrospective cohort   | Axelsson, 1984 (10)       | 745/1160                                 | Shift work (nd) vs no shift work                    | 1 trim           | 3.19 (1.36-7.47)  | +                 | No          | No                   | No                         |
|                        | Axelsson, 1989 (12)       | 463/970                                  | Three shifts vs day                                 | 1 trim           | 1.50 (0.55-4.09)  | +                 | No          | No                   | Yes (A) <sup>c</sup>       |
|                        |                           |                                          | Fixed night vs day                                  |                  | 0.93 (0.49-1.78)  | +                 | No          | No                   | Yes (B) <sup>c</sup>       |
|                        | Whelan, 2007 (2007)       | 7688/7688                                | 3 shifts vs day                                     | 1 trim           | 1.2 (0.9-1.5)     | +                 | No          | No                   | Yes (A) <sup>c</sup>       |
| Fixed night vs day     |                           |                                          |                                                     | 1.6 (1.3-1.9)    | +                 | No                | No          | Yes (B) <sup>c</sup> |                            |
| Case-control           | Hemminki, 1985 (19)       | 788/788                                  | 3-shift vs day or rotating 2-shift                  | 1 trim           | 1.5 (0.9-2.5)     | -                 | No          | No                   | Yes (A) <sup>c</sup>       |
|                        | Infante-Rivard, 1993 (20) | 1,324/1,324                              | Fixed evening vs day                                | Pregnancy        | 4.17 (2.19-7.92)  | +/-               | No          | No                   | No                         |
|                        |                           |                                          | Fixed night vs day                                  |                  | 2.68 (0.53-13.43) | +/-               | No          | No                   | Yes (B) <sup>c</sup>       |
|                        | Eskenazi, 1994 (16)       | 1,344/1,344                              | Evening/night vs day                                | First 20 weeks   | 0.8 (0.5-1.2)     | +/-               | No          | No                   | Yes (A) <sup>c</sup>       |
| El Metwalli, 2001 (14) | 1,762/1,762               | Before 8.00 and/or after 18.00 vs others | (nd)                                                | 1.57 (1.25-1.97) | +                 | Yes               | Yes         | No                   |                            |
| Cross-sectional        | Axelsson, 1988 (11)       | 1,110/1,714                              | Shift work (nd) vs no shift work                    | 1 trim           | 2.07 (0.98-4.34)  | +                 | No          | No                   | No                         |
|                        | McDonald, 1988 (25)       | ?/22,613                                 | Changing shifts vs all women working >30 hours/week | Pregnancy        | 1.45 (1.0-1.9)    | +/-               | No          | Yes                  | No                         |
|                        | Swan, 1995 (36)           | 444/444                                  | Night (nd) vs day                                   | 1 trim           | 1.7 (0.73-3.7)    | ++                | No          | No                   | No                         |
|                        | Axelsson, 1996 (13)       | 1,587/2,667                              | Three shift vs day                                  | 1 trim           | 1.23 (0.78-1.94)  | +                 | No          | No                   | Yes (A) <sup>c</sup>       |
| Fixed night vs day     |                           |                                          |                                                     | 1.30 (0.83-2.01) | +                 | No                | No          | Yes (B) <sup>c</sup> |                            |

nd: not defined; gw: gestational week <sup>a</sup> ++ inflationary bias likely; + inflationary bias possible; +/- bias unlikely; - bias towards the null possible or likely.

<sup>b</sup> Risk estimates for meta-analyses: A = shift work, and B = fixed night work

<sup>c</sup> Included in sensitivity meta-analysis as study with lower potential for bias

**Supplementary Table 5: Working hours and risk of miscarriage**

| Design               | Study                | Number of women/<br>pregnancies | Exposure                                        |                             |                                | Potential for     |             | Incomplete reporting | Meta-analysis<br>(Women working at least 40-52 hrs/wk) |
|----------------------|----------------------|---------------------------------|-------------------------------------------------|-----------------------------|--------------------------------|-------------------|-------------|----------------------|--------------------------------------------------------|
|                      |                      |                                 | Contrast                                        | Timing                      | RR (95% CI)                    | Bias <sup>a</sup> | Confounding |                      |                                                        |
| Prospective cohort   | Fenster, 1997 (17)   | 5144/5144                       | Hours worked/week                               | 1 trim                      | 0.86 (0.59-1.26)               | +/-               | No          | No                   | No                                                     |
|                      |                      |                                 | 31-35 vs ≤30                                    |                             |                                |                   |             |                      |                                                        |
|                      |                      |                                 | 36-40 vs ≤30                                    |                             |                                |                   |             |                      |                                                        |
|                      |                      |                                 | >40 vs ≤30                                      |                             | 0.82 (0.57-1.17)               | +/-               | No          | No                   | Yes <sup>b</sup>                                       |
| Retrospective cohort | Whelan, 2007 (33)    | 7688/7688                       | Hours worked/week<br>≥41 vs 21-40               | 1 trim                      | 1.5 (1.3-1.7)                  | +                 | No          | No                   | Yes <sup>b</sup>                                       |
| Case-control         | Eskenazi, 1994 (16)  | 1344/1344                       | Hours worked/week                               | First 20 weeks              | 1.3 (0.8-2.2)                  | +/-               | No          | No                   | No                                                     |
|                      |                      |                                 | 30-35 vs <30                                    |                             |                                |                   |             |                      |                                                        |
|                      |                      |                                 | 36-40 vs <30                                    |                             |                                |                   |             |                      |                                                        |
|                      |                      |                                 | >40 vs <30                                      |                             | 1.2 (0.8-1.9)                  | +/-               | No          | No                   | Yes <sup>b</sup>                                       |
| Cross-sectional      | McDonald, 1988 (25)  | ?/22,613                        | Working >46 hours/week vs all women             | Pregnancy                   | 1.33 (0.9-1.8)                 | +/-               | No          | Yes                  | Yes                                                    |
|                      | Klebanoff, 1990 (21) | 2787/2787                       | In average 74 hours/week vs 38 hours/week       | (nd)                        | 1.17 (0.94-1.45)               | +                 | No          | Yes                  | Yes                                                    |
|                      | John, 1994 (37)      | 376/376                         | Hours worked/week<br>≥41 vs 35-40               | 1 trim                      | 1.8 (0.9-3.8)                  | ++                | No          | No                   | Yes                                                    |
|                      | Swan, 1995 (36)      | 444/444                         | Hours worked/day<br>≥9 vs <9                    | 1 trim                      | 1.2 (0.61-2.2)                 | ++                | No          | No                   | Yes                                                    |
|                      | Schenker, 1997 (38)  | 345/711                         | Hours worked/week<br>35-45 vs <35<br>>45 vs <35 | 1 trim                      | 1.5 (0.8-2.9)<br>3.1 (1.4-6.9) | ++                | No          | No                   | No<br>Yes                                              |
|                      | Shiranga, 2008 (29)  | 442/940                         | Hours worked/week<br>>45 vs ≤45                 | Few months before pregnancy | 1.09 (0.69-1,71)               | ++                | No          | No                   | Yes                                                    |

|                   |        |                   |           |                  |    |    |    |    |     |
|-------------------|--------|-------------------|-----------|------------------|----|----|----|----|-----|
| Lee, 2012<br>(23) | 1000/? | Hours worked/week |           |                  |    |    |    |    |     |
|                   |        | 44-47 vs <44      | Pregnancy | 2.05 (1.15-3.63) | ++ | No | No | No | No  |
|                   |        | 48-51 vs <44      |           | 1.81 (1.02-3.22) | ++ | No | No | No | No  |
|                   |        | ≥52 vs <44        |           | 2.08 (1.16-3.74) | ++ | No | No | No | Yes |

nd: not defined; gw: gestational week; trim – trimester <sup>a</sup> ++ inflationary bias likely; + inflationary bias possible; +/- bias unlikely; - bias towards the null possible or likely

<sup>b</sup>Included in sensitivity meta-analysis as study with lower potential for bias

**Supplementary Table 6: Occupational lifting and risk of miscarriage**

| Design                 | Study               | Number of women/<br>pregnancies | Exposure                                 |        | RR (95% CI)      | Potential for     |             | Incomplete reporting | Meta-analysis<br>(Lifting ≥100 kg/day) |
|------------------------|---------------------|---------------------------------|------------------------------------------|--------|------------------|-------------------|-------------|----------------------|----------------------------------------|
|                        |                     |                                 | Contrast                                 | Timing |                  | Bias <sup>a</sup> | Confounding |                      |                                        |
| Prospective cohort     | Ahlborg, 1990 (9)   | 3906/3906                       | Any weight <10 (times/week) vs 0         | 1 trim | 1.03 (0.70-1.53) | +/-               | No          | No                   | No                                     |
|                        |                     |                                 | <12 kg ≥10 vs 0                          |        | 0.97 (0.53-1.78) | +/-               | No          | No                   | No                                     |
|                        |                     |                                 | ≥12 kg 10-50 vs 0                        |        | 1.11 (0.77-1.58) | +/-               | No          | No                   | No                                     |
|                        |                     |                                 | ≥12 kg >50 vs 0                          |        | 1.06 (0.62-1.81) | +/-               | No          | No                   | Yes <sup>b</sup>                       |
|                        | Florack, 1993 (18)  | 170/170                         | Lifting ≥1hour/day vs <1 hour/day        | 1 trim | 1.07 (0.34-3.35) | +/-               | No          | No                   | Yes <sup>b</sup>                       |
|                        | Fenster, 1997 (17)  | 5144/5144                       | Lifting >7 kg (times/day) 1-9 vs 0       | 1 trim | 1.14 (0.77-1.70) | +/-               | No          | No                   | No                                     |
|                        |                     |                                 | 10-15 vs 0                               |        | 0.99 (0.47-2.10) | +/-               | No          | No                   | No                                     |
| >15 or constantly vs 0 |                     |                                 | 0.40 (0.16-1.00)                         |        | +/-              | No                | No          | Yes <sup>b</sup>     |                                        |
| Retrospective cohort   | Axelson, 1984 (10)  | 745/1160                        | Heavy lifting (nd) vs other              | 1 trim | 1.36 (0.91-2.02) | ++                | No          | No                   | No                                     |
|                        | Axelson, 1989 (12)  | 463/970                         | Heavy lifting (nd) vs no heavy lifting   | 1 trim | 0.99 (0.75-1.31) | ++                | No          | No                   | No                                     |
| Case-control           | Taskinen, 1986 (30) | 160/160                         | Lifting >10kg continuously vs no lifting | 1 trim | 3.6 (1.0-13.7)   | +                 | No          | No                   | Yes <sup>b</sup>                       |
|                        | Kyyrönen, 1989 (22) | 419/419                         | Lifting >20kg >6 times/day or equivalent | 1 trim | 1.9 (1.0-2.8)    | ++                | No          | No                   | Yes                                    |
|                        | Taskinen, 1989 (31) | 371/371                         | Lifting >25kg/day vs <25 kg/day          | 1 trim | 1.7 (1.0-2.8)    | ++                | No          | No                   | No                                     |

|                 |                           |           |                                                                                 |                |                                                          |                |                |                |                              |
|-----------------|---------------------------|-----------|---------------------------------------------------------------------------------|----------------|----------------------------------------------------------|----------------|----------------|----------------|------------------------------|
|                 | Taskinen, 1990<br>(32)    | 687/687   | Lifting >10 kg or patient-transfer (times/week)<br>5-49 vs <5<br>≥50 vs <5      | 1 trim         | 1.2 (0.8-1.7)<br>3.5 (1.1-9.0)                           | ++<br>++       | No<br>No       | No<br>No       | No<br>Yes                    |
|                 | Eskenazi, 1994<br>(16)    | 1344/1344 | Lifting >7.5 kg (times/day)<br>1-9 vs 0<br>10-15 vs 0<br>>15 vs 0               | First 20 weeks | 1.3 (0.9-1.7)<br>0.6 (0.3-1.3)<br>1.1 (0.6-2.0)          | +<br>+<br>+    | No<br>No<br>No | No<br>No<br>No | No<br>No<br>Yes <sup>b</sup> |
|                 | Elliott, 1999<br>(15)     | 116/116   | Lifting heavy objects Yes/no                                                    | 1 trim         | 0.69(0.31-1.53)                                          | ++             | No             | Yes            | No                           |
|                 | El Metwalli, 2001<br>(14) | 1762/1762 | Lifting (nd) yes/no                                                             | (nd)           | 2.04(1.66-2.49)                                          | ++             | Yes            | Yes            | No                           |
|                 | Maconochie, 2007<br>(24)  | ?/4142    | Lifting heavy objects or people (nd) yes/no                                     | 1 trim         | 1.08 (0.85-1.38)                                         | ++             | No             | No             | No                           |
| Cross-sectional | Axelsson, 1988<br>(10)    | 1110/1459 | Heavy lifting (nd) vs no heavy lifting                                          | 1 trim         | 1.15 (0.78-1.72)                                         | ++             | No             | No             | No                           |
|                 | McDonald, 1988 (25)       | ?/22,613  | Lifting heavy weights>15 times/day vs other pregnant women                      | Pregnancy      | 2.0 (1.5-2.5)                                            | +              | No             | Yes            | Yes                          |
|                 | Swan, 1995<br>(36)        | 444/444   | Lifting >7 kg ≥1 time/day vs none                                               | 1 trim         | 1.5 (0.84-2.8)                                           | ++             | No             | No             | Yes                          |
|                 | Axelsson, 1996<br>(13)    | 1587/2667 | Lifting >10kg (times/week)<br><10 vs seldom<br>10-50 vs seldom<br>>50 vs seldom | 1 trim         | 0.93 (0.71-1.22)<br>0.84 (0.62-1.13)<br>0.74 (0.46-1.19) | ++<br>++<br>++ | No<br>No<br>No | No<br>No<br>No | No<br>No<br>Yes              |
|                 | Lee, 2012<br>(23)         | 1000/?    | Lifting >5kg vs ≤5 kg                                                           | Pregnancy      | 3.39 (2.06-5.6)                                          | ++             | No             | No             | No                           |

nd: not defined; gw: gestational week; trim - trimester

<sup>a</sup> ++ inflationary bias likely; + inflationary bias possible; +/- bias unlikely; - bias towards the null possible or likely

<sup>b</sup>Included in sensitivity meta-analysis as study with lower potential for bias

**Supplementary Table 7: Standing at work and risk of miscarriage**

| Design                | Study               | Number of women/<br>pregnancies     | Exposure                            |                            |                  | Potential for     |             | Incomplete reporting | Meta-analysis<br>(Standing ≥6-8 hours/day) |
|-----------------------|---------------------|-------------------------------------|-------------------------------------|----------------------------|------------------|-------------------|-------------|----------------------|--------------------------------------------|
|                       |                     |                                     | Contrast                            | Timing                     | RR (95% CI)      | Bias <sup>a</sup> | Confounding |                      |                                            |
| Prospective cohort    | Fenster, 1997 (17)  | 5144/5144                           | Standing (hours/day)<br>3-7 vs <3   | 1 trim                     | 0.90 (0.71-1.13) | +/-               | No          | No                   | No                                         |
|                       |                     |                                     | >7 vs <3                            |                            | 1.03 (0.73-1.46) |                   |             |                      |                                            |
| Case-control          | Taskinen, 1986 (30) | 162/162                             | Standing (nd) vs sedentary work     | 1 trim                     | 1.4 (0.5- 4.4)   | +                 | No          | No                   | No                                         |
|                       | Eskenazi, 1994 (16) | 1344/1344                           | Standing (hours/day)<br>3-7 vs <3   | First 20 weeks             | 1.1 (0.8-1.4)    | +                 | No          | No                   | No                                         |
|                       |                     | ≥ 8 vs <3                           | 1.6 (1.1-2.3)                       |                            | +                | Yes <sup>b</sup>  |             |                      |                                            |
|                       | Savitz, 1996 (28)   | 421/421                             | Standing (nd) vs non-hazardous jobs | 2-6 weeks after conception | 0.8 (0.5-1.5)    | +                 | No          | No                   | No                                         |
| Maconochie, 2007 (24) | ?/4192              | Standing > 6 hours day<br>yes vs no | 1 trim                              | 0.89 (0.69-1.14)           | ++               | No                | No          | Yes                  |                                            |
| Cross-sectional       | McDonald, 1988 (25) | ?/22,613                            | Standing >8 hours/day vs all women  | Pregnancy                  | 1.32 (1.1-3.5)   | +                 | No          | Yes                  | Yes                                        |
|                       | John, 1994 (37)     | 376/376                             | Standing (hours/day)<br>7-8 vs <7   | 1 trim                     | 0.9 (0.4-1.9)    | ++                | No          | No                   | No                                         |
|                       |                     | ≥9 vs <7                            | 1.0 (0.4-2.6)                       |                            | ++               | No                |             |                      |                                            |
| Ronda, 2010 (27)      | 94/94               | Standing (hours/day)<br>≥8 vs <8    | 1 trim                              | 1.3 (0.1-12.3)             | ++               | No                | No          | Yes                  |                                            |

nd: not defined; gw: gestational week; trim - trimester

<sup>a</sup> ++ inflationary bias likely; + inflationary bias possible; +/- bias unlikely; - bias towards the null possible or likely

<sup>b</sup>Included in sensitivity meta-analysis as study with lower potential for bias

**Supplementary Table 8: Physical workload and risk of miscarriage**

| Design             | Study               | Number of women/<br>pregnancies | Exposure                                                                                  |           | RR (95% CI)      | Potential for     |             | Incomplete reporting | Meta-analysis |
|--------------------|---------------------|---------------------------------|-------------------------------------------------------------------------------------------|-----------|------------------|-------------------|-------------|----------------------|---------------|
|                    |                     |                                 | Contrast                                                                                  | Timing    |                  | Bias <sup>a</sup> | Confounding |                      |               |
| Prospective cohort | Florack, 1993 (18)  | 170/170                         | >3.5 * basal metabolic rate vs ≤3.5* basal metabolic rate                                 | 1 trim    | 1.2 (0.5-2.6)    | +/-               | No          | No                   | No            |
|                    | Fenster, 1997 (17)  | 5144/5144                       | Physical intensity at job<br>Very strenuous vs somewhat, not very or not at all strenuous | 1 trim    | 1.12 (0.74-1.71) | +/-               | No          | No                   | No            |
| Case-control       | Wong, 2010 (34)     | 1752/3006                       | Physical activity                                                                         | ≤20 gw    | 0.32 (0.17-0.61) | +                 | No          | No                   | No            |
|                    |                     |                                 | Light vs sedentary                                                                        |           |                  |                   |             |                      |               |
|                    |                     |                                 | Medium vs sedentary                                                                       |           |                  |                   |             |                      |               |
| Heavy vs sedentary | 0.43 (0.23-0.80)    | +                               | No                                                                                        | No        | No               |                   |             |                      |               |
|                    |                     |                                 |                                                                                           |           | 0.44 (0.16-1.23) | +                 | No          | No                   | No            |
| Cross-sectional    | McDonald, 1988 (25) | ?/22,613                        | Physical effort (nd) vs all women                                                         | Pregnancy | 1.87 (1.4-2.3)   | +                 | No          | Yes                  | No            |
|                    | Naidoo, 2011 (26)   | 887/4796                        | Physical exertion score ≥6 on a 1-9 scale                                                 | (nd)      | 1.5 (1.0-2.2)    | ++                | Yes         | Yes                  | No            |

nd: not defined; gw: gestational week; trim - trimester

<sup>a</sup> ++ inflationary bias likely; + inflationary bias possible; +/- bias unlikely; - bias towards the null possible or likely
